# Supplementary material
Source: publisher figshare collection journal article supplement (https://gsajournals.figshare.com/articles/dataset/_/6024338)
Supplement: Supplementary file 1 [file 1]

Archive with 2 entries (2 files):
- Erickson et al 2018_supplemental_materials.pdf
- Erickson et al File S1.xlsx
