# Supplementary material
Source: publisher figshare collection journal article supplement (https://gsajournals.figshare.com/articles/dataset/_/6024338)
Supplement: Supplementary file 1 [file 1 › Erickson et al File S1.xlsx]

## Sheet: PAXB_RP1
id	Clutch	SL	Genotype	EB
1624-1	1624	19.095	MR	0.554952
1624-2	1624	19.93	MR	0.58144
1624-3	1624	22.305	MR	0.646882
1624-4	1624	19.675	MR	0.606111
1624-5	1624	22.055	MR	0.645064
1624-6	1624	19.185	MR	0.543786
1624-7	1624	21.955	MR	0.65675
1624-8	1624	22.545	MM	0.618316
1624-9	1624	20.73	MR	0.543266
1624-10	1624	21.025	MR	0.579623
1624-11	1624	18.165	MM	0.549758
1624-12	1624	24.13	MM	0.724268
1624-13	1624	21.19	MR	0.620393
1624-14	1624	20.79	MM	0.586115
1624-15	1624	19.665	MR	0.600397
1624-16	1624	20.785	MM	0.558588
1624-17	1624	21.215	MM	0.610785
1624-18	1624	24.235	MR	0.698559
1624-19	1624	21.63	MR	0.635975
1624-20	1624	22.65	MM	0.659087
1624-21	1624	19.705	MM	0.558588
1624-22	1624	19.55	MR	0.566638
1624-23	1624	20.79	MR	0.593386
1624-24	1624	20.67	MR	0.597022
1624-25	1624	20.175	MM	0.597541
1624-26	1624	20.34	MM	0.577545
1624-27	1624	23.75	MM	0.669474
1624-28	1624	20.095	MR	0.620653
1624-29	1624	21.62	MM	0.635715
1624-30	1624	19.535	MR	0.5817
1624-31	1624	21.93	MM	0.600657
1624-32	1624	20.615	MM	0.599099
1624-33	1624	18.88	MM	0.550797
1624-34	1624	19.64	MR	0.533138
1624-35	1624	18.915	MM	0.536255
1624-36	1624	20.395	MM	0.593646
1624-37	1624	19.7	MM	0.560665
1624-38	1624	21.37	MM	0.614421
1624-39	1624	19.725	NA	0.551317
1624-40	1624	24.4	MR	0.677525
1624-41	1624	19.615	MM	0.550018
1624-42	1624	21.37	MR	0.618316
1624-43	1624	17.675	MM	NA
1629-44	1629	20.52	MR	0.547681
1629-45	1629	19	MR	0.521193
1629-46	1629	19.215	NA	0.533658
1629-47	1629	22.62	MM	0.648959
1629-48	1629	20.13	MM	0.552096
1629-49	1629	20.03	MM	0.522491
1629-50	1629	20.83	MR	0.598839
1629-51	1629	17.92	MR	0.501197
1629-52	1629	23.155	MM	0.616498
1629-53	1629	19.75	MM	0.514181
1629-54	1629	18.67	MR	0.492627
1629-55	1629	22.17	MM	0.591049
1629-56	1629	21.465	MM	0.572092
1629-57	1629	19.705	MR	0.549499
1629-58	1629	21.105	MM	0.594944
1629-59	1629	22.21	NA	0.620134
1629-60	1629	18.105	MM	0.510805
1629-61	1629	20.725	MR	0.568975
1629-62	1629	20.17	MM	0.524828
1629-63	1629	21.16	MR	0.634157
1629-64	1629	21.425	MR	0.589231
1629-65	1629	19.945	MM	0.586115
1629-66	1629	20.185	MM	0.536514
1629-67	1629	20.345	MR	0.582219
1629-68	1629	19.925	MM	0.535735
1629-69	1629	18.365	MM	0.50691
1629-70	1629	19.925	MM	0.535216
1629-71	1629	21.375	NA	0.590529
1629-72	1629	20.23	MM	0.557809
1629-73	1629	21.15	MR	0.604552
1629-74	1629	20.69	MR	0.582739
1629-75	1629	20.985	MM	0.59001
1629-76	1629	18.66	MR	0.526906
1629-77	1629	21.35	MM	0.620134
1644-49	1644	19.585	MM	0.483665
1644-50	1644	21.295	MM	0.548995
1644-51	1644	17.315	MM	0.477243
1644-52	1644	19.255	MM	0.522863
1644-53	1644	19.16	MM	0.542573
1644-54	1644	20.14	MM	0.54966
1644-55	1644	20.65	MR	0.593508
1644-56	1644	20.305	MR	0.574906
1644-57	1644	20.78	MM	0.551431
1644-58	1644	19.13	MR	0.557854
1644-59	1644	20.52	MR	0.592844
1644-60	1644	19.04	MM	0.503153
1644-61	1644	18.09	MM	0.488316
1644-62	1644	19.01	MM	0.489423
1644-63	1644	20.88	MR	0.577563
1644-64	1644	20.915	MM	0.578449
1644-65	1644	20.61	MM	0.625398
1644-66	1644	19.505	MM	0.552096
1644-67	1644	20.395	MM	0.570698
1644-68	1644	20.275	MM	0.574684
1644-69	1644	19.265	MM	0.49961
1644-70	1644	19.73	MM	0.536372
1644-71	1644	18.69	MR	0.52242
1644-72	1644	18.405	MR	0.521534
1644-73	1644	19.3	MR	0.511569
1644-74	1644	19.6	MM	0.537922
1644-75	1644	19.83	MR	0.52397
1644-76	1644	19.065	MM	0.506254
1644-77	1644	18.81	MR	0.524856
1644-78	1644	19.355	MM	0.533936
1644-79	1644	18.505	MM	0.5284
1644-80	1644	19.37	MR	0.531279
1644-81	1644	20.51	MM	0.534822
1644-82	1644	19.175	MR	0.548331
1644-83	1644	18.395	MM	0.518212
1644-84	1644	19.695	MR	0.551431
1644-85	1644	18.3	MR	0.5284
1644-86	1644	18.64	MR	0.477464
1644-87	1644	18.32	MR	0.566048
1644-88	1644	17.925	MR	0.494738
1644-89	1644	18.97	MR	0.50271
1644-90	1644	17.84	MM	0.504482
1644-91	1644	17.325	MM	0.48898
1644-92	1644	18.765	MR	0.516884
1644-93	1644	17.08	MR	0.46462
1644-94	1644	17.07	MR	0.469935
1644-95	1644	17.945	MM	0.464841
1644-96	1644	17.9	MR	0.505368

## Sheet: PAXB_RP2
id	Clutch	SL	Genotype	EB
1643-1	1643	19.25	MM	0.537553
1643-2	1643	16.725	MR	0.483278
1643-3	1643	21.28	MR	0.620653
1643-4	1643	22.2	MR	0.61468
1643-5	1643	19.085	MM	0.553654
1643-6	1643	17.13	MR	0.485616
1643-7	1643	19.035	MR	0.536255
1643-8	1643	20.49	MM	0.587413
1643-9	1643	20.995	MM	0.622211
1643-10	1643	21.94	MR	0.610266
1643-11	1643	20.03	MR	0.571572
1643-12	1643	22.095	MR	0.658308
1643-13	1643	22.08	MR	0.606111
1643-14	1643	19.22	MR	0.546642
1643-15	1643	18.09	MR	0.527425
1643-16	1643	20.75	NA	0.578064
1643-17	1643	17.64	MM	0.491588
1643-18	1643	18.74	MM	0.554433
1643-19	1643	17.615	MM	0.53158
1643-20	1643	20.265	MR	0.549239
1643-21	1643	19.265	MM	0.55703
1643-22	1643	20.435	MM	0.583258
1643-23	1643	19.215	MM	0.56482
1643-24	1643	18.775	MM	0.543007
1643-25	1643	18.71	MM	0.528724
1643-26	1643	17.865	MR	0.496522
1643-27	1643	19.97	MR	0.592087
1643-28	1643	20.73	MR	0.595463
1643-29	1643	18.295	MR	0.490809
1643-30	1643	18.02	MM	0.512623
1643-31	1643	18.25	MM	0.491588
1643-32	1643	20.55	MM	0.616498
1643-33	1643	18.49	MM	0.525867
1643-34	1643	17.945	MM	0.519635
1643-35	1643	17.32	MM	0.480162
1643-36	1643	18.315	MM	0.505612
1643-37	1643	20.355	MR	0.576506
1643-38	1643	18.07	MM	0.512363
1643-39	1643	16.55	MR	0.460945
1643-40	1643	17.53	MR	0.45731
1643-41	1643	17.405	MM	0.487174
1643-42	1643	17.925	MM	0.501716
1643-43	1643	17.79	MM	0.516259
1643-44	1643	17.72	MM	0.496263
1643-45	1643	16.24	MR	0.446922
1643-46	1643	18.98	MR	0.52327
1643-47	1643	19.23	MM	0.545863
1643-48	1643	18.06	MM	0.514181
1643-49	1643	19.495	MM	0.531061
1643-50	1643	16.91	MR	0.474709
1643-51	1643	19.505	MR	0.575468
1643-52	1643	16.87	MM	0.493406
1643-53	1643	17.55	MM	0.493406
1643-54	1643	18.03	MR	0.520154
1643-55	1643	16.71	MR	0.459127
1643-56	1643	17.425	MR	0.505092
1643-57	1643	18.705	MR	0.515999
1643-58	1643	16.79	MR	0.458089
1643-59	1643	16.825	MR	0.497302
1643-60	1643	17.245	MR	0.468217
1643-61	1643	17.445	MR	0.487433
1645-62	1645	23.28	MR	0.668176
1645-63	1645	20.315	MM	0.547421
1645-64	1645	20.96	MM	0.621432
1645-65	1645	23.235	MR	0.64013
1645-66	1645	21.515	MM	0.604552
1645-67	1645	19.85	MR	0.579103
1645-68	1645	20.56	MM	0.586634
1645-69	1645	19.135	MR	0.563782
1645-70	1645	21.9	MR	0.578843
1645-71	1645	19.605	MM	0.569495
1645-72	1645	22.795	MM	0.646622
1645-73	1645	21.915	MM	0.6313
1645-74	1645	20.13	MM	0.570014
1645-75	1645	20.995	MR	0.610266
1645-76	1645	20.89	MR	0.586634
1645-77	1645	21.1	NA	0.598839
1645-78	1645	20.415	MR	0.553394
1645-79	1645	20.03	MM	0.549499
1645-80	1645	20.51	MR	0.586894
1645-81	1645	19.735	MM	0.540929
1645-82	1645	21.2	MM	0.621432
1645-83	1645	21.765	MR	0.579103
1645-84	1645	20.255	MR	0.5817
1645-85	1645	20.66	MR	0.585595
1645-86	1645	20.85	MM	0.569754
1645-87	1645	21.62	MM	0.603773
1645-88	1645	21.81	MM	0.593126
1645-89	1645	21.99	MM	0.620653
1645-90	1645	20.245	MM	0.544305
1645-91	1645	22.735	MR	0.646102
1645-92	1645	20.69	MR	0.590789
1645-93	1645	19.855	MM	0.557809
1645-94	1645	19.015	MM	0.54846
1645-95	1645	18.875	MR	0.578843
1645-96	1645	18.89	MR	0.546123

## Sheet: PAXB_RP3
id	Clutch	SL	Genotype	EB
1131-1	1131	24.475	MR	0.645596
1131-2	1131	23.7	NA	0.560235
1131-3	1131	25.305	NA	0.645596
1131-4	1131	24.405	MF	0.609546
1131-5	1131	24.34	FR	0.633994
1131-6	1131	24.07	MR	0.567694
1131-7	1131	24.67	FR	0.670459
1131-8	1131	25.385	MM	0.635651
1131-9	1131	24.52	NA	0.664658
1131-10	1131	24.365	MM	0.558992
1131-11	1131	25.54	NA	0.614518
1131-12	1131	24.635	MM	0.625292
1131-13	1131	23.485	MF	0.607474
1131-14	1131	27.955	MF	0.661343
1131-15	1131	22.85	FR	0.633994
1131-16	1131	24.185	FR	0.646011
1131-17	1131	24.745	FR	0.623634
1131-18	1131	25.56	MR	0.664658
1131-19	1131	24.135	MR	0.59007
1131-20	1131	23.165	MR	0.548218
1131-21	1131	24.035	MM	0.621148
1131-22	1131	22.93	MF	0.575567
1131-23	1131	22.86	MF	0.578882
1131-24	1131	21.93	FR	0.547804
1131-25	1131	25.27	MM	0.650983
1131-26	1131	24.915	MM	0.611203
1131-27	1131	27.43	MM	0.730543
1131-28	1131	25.81	MM	0.660514
1131-29	1131	25.115	FR	0.597114
1131-30	1131	26.175	FR	0.703609
1131-31	1131	25.4	FR	0.631922
1131-32	1131	24.76	MM	0.607474
1131-33	1131	23.44	FR	0.641452
1131-34	1131	24.94	MR	0.613275
1131-35	1131	23.37	MR	0.624877
1131-36	1131	25.065	MM	0.650154
1131-37	1131	23.535	MR	0.618662
1131-38	1131	23.275	FR	0.520041
1131-39	1131	22.55	FR	0.619076
1131-40	1131	24.24	MF	0.621562
1131-41	1131	23.78	MM	0.611618
1131-42	1131	22.05	MR	0.585512
1131-43	1131	26.415	MF	0.65637
1131-44	1131	25.695	NA	0.641867
1131-45	1131	26.075	MM	0.648497
1131-46	1131	22.64	MR	0.591727
1131-47	1131	26.68	MM	0.617419
1131-48	1131	26.04	MR	0.645596
1131-49	1131	22.965	MM	0.539516
1131-50	1131	23.76	FR	0.614932
1131-51	1131	24.945	NA	0.620319
1131-52	1131	21.495	MF	0.544903
1131-53	1131	24.995	MM	0.661757
1131-54	1131	24.02	MM	0.635237
1131-55	1131	24.02	MM	0.592142
1131-56	1131	24.62	MM	0.558578
1131-57	1131	23.18	NA	0.605816
1131-58	1131	21.625	NA	0.516311
1131-59	1131	20.68	MR	0.546146
1131-60	1131	24.02	MR	0.627364
1131-61	1131	24.95	NA	0.625292
1131-62	1131	23.52	MR	0.577224
1131-63	1131	21.75	NA	0.547389
1131-64	1131	26.43	NA	0.659271
1131-65	1131	25.835	NA	0.672531
1131-66	1131	26.37	MM	0.629436
1131-67	1131	22.615	MF	0.556091
1131-68	1131	22.755	NA	0.615347
1131-69	1131	24.78	FR	0.65637
1131-70	1131	24.24	NA	0.648911
1131-71	1131	23.51	NA	0.620319
1131-72	1131	26.43	MF	0.675017
1131-73	1131	24.92	MM	0.634408
1131-74	1131	22.315	NA	0.584683
1131-75	1131	24.185	FR	0.633579
1131-76	1131	22.265	MF	0.567694
1131-77	1131	23.32	NA	0.561478
1131-78	1131	24.55	MF	0.62985
1131-79	1131	23.35	MM	0.654298
1131-80	1131	23.335	MR	0.613275
1131-81	1131	24.695	FR	0.612032
1131-82	1131	25.19	MM	0.627778
1131-83	1131	24.495	MR	0.633165
1131-84	1131	25.2	NA	0.680404
1131-85	1131	26.145	NA	0.689106
1131-86	1131	22.67	MF	0.584683
1131-87	1131	22.16	MM	0.585512
1131-88	1131	22.9	MF	0.589656
1131-89	1131	24.11	FR	0.634822
1131-90	1131	23.835	MM	0.60996
1131-91	1131	23.015	MM	0.60996
1131-92	1131	24.155	FR	0.622806
1131-93	1131	22.905	NA	0.607474
1131-94	1131	25.375	MR	0.634408
1131-95	1131	25.365	NA	0.615347
1131-96	1131	22.285	MM	0.566036
1132-1	1132	24.955	MF	0.633165
1132-2	1132	24.22	NA	0.624049
1132-3	1132	25.145	FR	0.619905
1132-4	1132	23.695	FR	0.641452
1132-5	1132	22.91	FR	0.570594
1132-6	1132	25.03	FR	0.630679
1132-7	1132	26.22	MR	0.669216
1132-8	1132	27.1	MF	0.685376
1132-9	1132	25.09	FR	0.648911
1132-10	1132	27.03	FR	0.687034
1132-11	1132	24.31	MM	0.589656
1132-12	1132	25.32	MF	0.681647
1132-13	1132	26.065	MF	0.647668
1132-14	1132	26.24	MM	0.63648
1132-15	1132	25.2	FR	0.655541
1132-16	1132	26.2	MF	0.638966
1132-17	1132	26.74	MM	0.695736
1132-18	1132	27.02	MM	0.667972
1132-19	1132	26.145	FR	0.657613
1132-20	1132	24.72	MF	0.657613
1132-21	1132	25.82	FR	0.71604
1132-22	1132	24.425	FR	0.62985
1132-23	1132	22.335	FR	0.64974
1132-24	1132	25.145	MF	0.640209
1132-25	1132	29.365	MM	0.758306
1132-26	1132	27.18	MR	0.662586
1132-27	1132	25.395	MR	0.617004
1132-28	1132	25.865	FR	0.692421
1132-29	1132	25.33	MM	0.616176
1132-30	1132	26.435	MF	0.650154
1132-31	1132	21.41	MR	0.554848
1132-32	1132	25.1	MM	0.647254
1132-33	1132	27.69	NA	0.698636
1132-34	1132	28.93	MR	0.684133
1132-35	1132	21.715	MF	0.572252
1132-36	1132	25.59	FR	0.639795
1132-37	1132	28.01	MR	0.724327
1132-38	1132	26.08	MM	0.646839
1132-39	1132	25.465	MR	0.631507
1132-40	1132	23.09	MM	0.607888
1132-41	1132	22.26	FR	0.630679
1132-42	1132	25.55	MF	0.667972
1132-43	1132	24.07	FR	0.668387
1132-44	1132	24.75	FR	0.665486
1132-45	1132	24.22	NA	0.658027
1132-46	1132	25.255	MM	0.602501
1132-47	1132	24.545	FR	0.660514
1132-48	1132	25.88	MM	0.644353
1132-49	1132	26.335	MR	0.665901
1132-50	1132	23.25	MM	0.638966
1132-51	1132	25.13	MF	0.640624
1132-52	1132	23.84	MR	0.577639
1132-53	1132	23.655	FR	0.614932
1132-54	1132	25.65	MF	0.664658
1132-55	1132	24.645	MR	0.566036
1132-56	1132	21.985	MF	0.597529
1132-57	1132	26.355	MM	0.648911
1132-58	1132	22.665	MR	0.566865
1132-59	1132	21.865	MF	0.641452
1132-60	1132	25.815	MF	0.670044
1132-61	1132	20.91	MM	0.546975
1132-62	1132	23.26	MM	0.602087
1132-63	1132	25.11	MF	0.686619
1132-64	1132	25.75	MR	0.613689
1132-65	1132	26.6	MF	0.670873
1132-66	1132	26.415	MF	0.715211
1132-67	1132	24.165	MF	0.575152
1132-68	1132	18.835	FR	0.534958
1132-69	1132	21.035	MR	0.584269
1132-70	1132	21.575	MM	0.552776
1132-71	1132	21.235	MM	0.589241
1132-72	1132	23.82	MF	0.652226
1132-73	1132	23.245	MF	0.602087
1132-74	1132	25.095	MM	0.681233
1132-75	1132	24.48	MM	0.670459
1132-76	1132	22.025	FR	0.617419
1132-77	1132	22.2	FR	0.558578
1132-78	1132	21.855	MR	0.594214
1132-79	1132	21.685	MM	0.599186
1132-80	1132	20.115	MR	0.520869
1132-81	1132	21.95	MF	0.602087
1132-82	1132	24.18	MF	0.671288
1132-83	1132	22.385	MF	0.579296
1132-84	1132	22.92	MR	0.60333
1132-85	1132	27.76	MM	0.680818
1132-86	1132	21.705	MR	0.56355
1132-87	1132	21.94	FR	0.584683
1132-88	1132	23.7	MF	0.622806
1132-89	1132	27.105	MM	0.687034
1132-90	1132	23.245	MM	0.578468
1132-91	1132	23.615	MF	0.643524
1132-92	1132	22.915	FR	0.589241
1132-93	1132	23.33	MR	0.59007
1132-94	1132	22.875	MF	0.611618
1132-95	1132	26.885	MM	0.692006
1132-96	1132	23.03	MM	0.635237

## Sheet: PAXB_RP4
id	Clutch	SL	Genotype	EB
1130-1	1130	25.835	MF	0.706095
1130-2	1130	23.52	MM	0.646425
1130-3	1130	25.575	MF	0.662586
1130-4	1130	26.96	MR	0.719355
1130-5	1130	26.265	MM	0.700294
1130-6	1130	24.485	MF	0.666729
1130-7	1130	26.08	MR	0.688691
1130-8	1130	25.69	FR	0.703194
1130-9	1130	27.42	MF	0.726399
1130-10	1130	25.31	MM	0.675431
1130-11	1130	25.45	MF	0.704023
1130-12	1130	24.3	MR	0.654713
1130-13	1130	25.03	MR	0.696979
1130-14	1130	23.995	MF	0.65637
1130-15	1130	25.245	MR	0.703609
1130-16	1130	24.855	MM	0.664243
1130-17	1130	23.21	MF	0.661343
1130-18	1130	25.96	MF	0.670873
1130-19	1130	25.075	FR	0.727228
1130-20	1130	26.33	MR	0.702366
1130-21	1130	27.055	MF	0.715211
1130-22	1130	23.565	MM	0.634822
1130-23	1130	24.285	MF	0.618662
1130-24	1130	25.22	MR	0.623634
1130-25	1130	27.465	MF	0.738416
1130-26	1130	23.245	MF	0.678332
1130-27	1130	24.255	MR	0.701951
1130-28	1130	25.44	MR	0.709824
1130-29	1130	21.555	MR	0.608717
1130-30	1130	25.13	FR	0.723913
1130-31	1130	24.7	FR	0.677503
1130-32	1130	23.205	MR	0.641038
1130-33	1130	21.68	FR	0.584683
1130-34	1130	24.315	MF	0.646011
1130-35	1130	23.745	FR	0.664658
1130-36	1130	23.57	MM	0.630679
1130-37	1130	26.635	MF	0.715211
1130-38	1130	22.385	MM	0.620319
1130-39	1130	22.285	MR	0.662171
1130-40	1130	24.58	MM	0.651397
1130-41	1130	25.43	FR	0.667558
1130-42	1130	24.15	MM	0.630679
1130-43	1130	20.945	MF	0.581782
1130-44	1130	22.59	MR	0.619905
1130-45	1130	26.625	MR	0.683719
1130-46	1130	23.515	MF	0.632751
1130-47	1130	24.605	MF	0.698636
1130-48	1130	26.02	FR	0.684547
1130-49	1130	24.735	MF	0.691177
1130-50	1130	27.22	MR	0.703609
1130-51	1130	25.565	MF	0.650154
1130-52	1130	27.36	MF	0.711482
1130-53	1130	25.68	MR	0.730129
1130-54	1130	29.155	MR	0.840767
1130-55	1130	27.26	MM	0.713139
1130-56	1130	24.475	MR	0.694078
1130-57	1130	26.705	MM	0.713968
1130-58	1130	28.035	MM	0.701122
1130-59	1130	26.29	MM	0.704023
1130-60	1130	27.685	MF	0.791871
1130-61	1130	23.21	MF	0.613275
1130-62	1130	23.355	MM	0.604573
1130-63	1130	26.315	FR	0.667144
1130-64	1130	25.625	MF	0.641452
1130-65	1130	26.27	MM	0.689934
1130-66	1130	25.32	MR	0.683719
1130-67	1130	24.335	MF	0.646839
1130-68	1130	26.525	FR	0.751262
1130-69	1130	24.255	MF	0.641038
1130-70	1130	23.08	FR	0.664658
1130-71	1130	27.165	MF	0.715211
1130-72	1130	26.51	MF	0.718526
1130-73	1130	24.4	MM	0.631922
1130-74	1130	29.175	MM	0.771566
1130-75	1130	25.33	MM	0.671288
1130-76	1130	26.125	FR	0.688277
1130-77	1130	23.86	MR	0.628193
1130-78	1130	23.73	FR	0.64311
1130-79	1130	20.575	MR	0.551119
1130-80	1130	23.835	MR	0.605816
1130-81	1130	26.6	MM	0.69615
1130-82	1130	24.805	MR	0.650154
1130-83	1130	23.795	MM	0.628607
1130-84	1130	22.795	MR	0.618662
1130-85	1130	25.835	MR	0.626121
1130-86	1130	24.18	MM	0.629436
1130-87	1130	25.935	FR	0.721012
1130-88	1130	22.95	MM	0.605816
1130-89	1130	24.35	MM	0.696979
1130-90	1130	26.035	MF	0.681233
1130-91	1130	23.685	FR	0.681233
1130-92	1130	26.655	FR	0.722256
1130-93	1130	22.12	MF	0.619076
1130-94	1130	22.735	MF	0.62322
1130-95	1130	20.825	MF	0.577639
1130-96	1130	25.58	MF	0.669216
1130-97	1130	23.28	MM	0.61659
1130-98	1130	21.64	FR	0.612861
1130-99	1130	20.1	MR	0.538273
1130-100	1130	26.1	MM	0.696979
1130-101	1130	24.455	FR	0.621977
1130-102	1130	23.325	MM	0.588412
1121-1	1121	24.5	FR	0.648911
1121-2	1121	26.545	MR	0.738416
1121-3	1121	27.585	MR	0.794357
1121-4	1121	24.645	MR	0.677503
1121-5	1121	20.225	MM	0.500979
1121-6	1121	23.72	MM	0.606231
1121-7	1121	20.465	MR	0.480675
1121-8	1121	21.605	FR	0.574738
1121-9	1121	25.13	FR	0.673774
1121-10	1121	18.36	MR	0.521284
1121-11	1121	16.785	MR	0.430121
1121-12	1121	21.98	MM	0.584269
1121-13	1121	23.455	MF	0.611203
1121-14	1121	25.345	MM	0.650983
1121-15	1121	25.215	MF	0.680818
1121-16	1121	20.79	MR	0.558992
1121-17	1121	23.01	MF	0.604573
1121-18	1121	20.445	MM	0.522112
1121-19	1121	19.03	FR	0.498079
1121-20	1121	21.65	MF	0.573495
1121-21	1121	18.15	MM	0.496836
1121-22	1121	18.86	MR	0.484404
1121-23	1121	20.075	MF	0.528328
1121-24	1121	14.1	FR	0.399457
1121-25	1121	16.915	MR	0.471144
1121-26	1121	18.03	MR	0.4641
1121-27	1121	15.15	FR	0.43095
1121-28	1121	14.17	MR	0.379153
1121-29	1121	19.985	MF	0.494349
1121-30	1121	19.49	MF	0.550704
1121-31	1121	21.42	MR	0.651812
1121-32	1121	20.91	MM	0.533301
1121-33	1121	22.51	FR	0.581368
1121-34	1121	19.56	MR	0.531643
1121-35	1121	21.54	NA	0.590899
1121-36	1121	23.235	MR	0.589656
1121-37	1121	20.8	NA	0.542417
1121-38	1121	23.335	MM	0.592556
1121-39	1121	22.51	MM	0.57018
1121-40	1121	24.255	MR	0.643524
1121-41	1121	19.37	MR	0.512167
1121-42	1121	17.695	MR	0.484404
1121-43	1121	16.39	MR	0.451669
1121-44	1121	20.14	MR	0.532472
1121-45	1121	19.055	NA	0.520041
1121-46	1121	17.85	MR	0.496421
1121-47	1121	13.87	MR	0.400701
1121-48	1121	15.14	MF	0.440481
1121-49	1121	19.95	NA	0.511753
1121-50	1121	21.92	MM	0.581782
1121-51	1121	19.495	MM	0.530814
1121-52	1121	21.71	FR	0.641867
1121-53	1121	24.745	MR	0.675431
1121-54	1121	21.175	MM	0.628607
1121-55	1121	19.055	MF	0.531229
1121-56	1121	18.76	MR	0.495593
1121-57	1121	21.375	MR	0.561064
1121-58	1121	17.625	MR	0.496836
1121-59	1121	20.445	MM	0.537444
1121-60	1121	25.11	MF	0.712725
1121-61	1121	24.325	MM	0.632751
1121-62	1121	21.8	FR	0.558578
1121-63	1121	21.03	FR	0.569351
1121-64	1121	18.58	MM	0.510096
1121-65	1121	20.595	MF	0.528328
1121-66	1121	21.45	FR	0.577639
1121-67	1121	16.54	FR	0.454569
1121-68	1121	16.97	MF	0.4641
1121-69	1121	16.95	FR	0.485648

## Sheet: PAXB_RP5
id	Clutch	SL	Genotype	EB
1711-1	1711	18.765	MRP4	0.516782
1711-2	1711	20.59	MRP4	0.554643
1711-3	1711	20.77	MRP4	0.54801
1711-4	1711	20.485	MR	0.573159
1711-5	1711	26.085	MRP4	0.605768
1711-6	1711	21.42	MR	0.573711
1711-7	1711	20.885	MR	0.547181
1711-8	1711	21.12	MR	0.586424
1711-9	1711	20.355	MR	0.575369
1711-10	1711	18.405	MRP4	0.52452
1711-11	1711	20.845	MRP4	0.493845
1711-12	1711	19.84	MR	0.493292
1711-13	1711	18.87	MRP4	0.533087
1711-14	1711	20.675	MRP4	0.600241
1711-15	1711	18.545	MRP4	0.483067
1711-16	1711	19.89	MRP4	0.569566
1711-17	1711	22.06	MRP4	0.623455
1711-18	1711	18.035	MR	0.528389
1711-19	1711	19.65	MRP4	0.539443
1711-20	1711	20.805	MRP4	0.591951
1711-21	1711	23.235	MR	0.686187
1711-22	1711	16.595	MR	0.470907
1711-23	1711	16.93	MRP4	0.492187
1711-24	1711	20.22	MR	0.556301
1711-25	1711	21.465	MRP4	0.544418
1711-26	1711	20.755	MRP4	0.582002
1711-27	1711	21.625	MR	0.61627
1711-28	1711	21.345	MR	0.593332
1711-29	1711	21.055	MR	0.609637
1711-30	1711	21.565	MR	0.594991
1711-31	1711	19.135	MR	0.546352
1711-32	1711	20.11	MR	0.552432
1711-33	1711	19.32	MR	0.539167
1711-34	1711	21.245	MRP4	0.586147
1711-35	1711	21.11	MRP4	0.606321
1711-36	1711	18.3	MRP4	0.533087
1711-37	1711	21.095	MRP4	0.612954
1711-38	1711	18.62	MR	0.572882
1711-39	1711	18.68	MRP4	0.477816
1711-40	1711	21.94	MRP4	0.590292
1711-41	1711	18.17	MRP4	0.544141
1711-42	1711	19.825	MR	0.535574
1711-43	1711	24.09	MR	0.653578
1711-44	1711	21.305	MRP4	0.560446
1711-45	1711	20.31	MR	0.582555
1711-46	1711	23.425	MRP4	0.684253
1711-47	1711	19.575	MR	0.527007
1711-48	1711	23.835	MR	0.677068
1711-49	1711	19.555	MR	0.53668
1711-50	1711	24.745	MRP4	0.690609
1711-51	1711	20.71	MRP4	0.583384
1711-52	1711	22.19	MR	0.620139
1711-53	1711	19.715	MR	0.519822
1711-54	1711	23.13	MR	0.669606
1711-55	1711	20.055	MRP4	0.552156
1711-56	1711	20.61	MRP4	0.560999
1711-57	1711	20.78	MRP4	0.543312
1711-58	1711	18.215	MR	0.514295
1711-59	1711	19.455	MR	0.545799
1711-60	1711	16.35	MR	0.487765
1711-61	1711	18.905	MRP4	0.553261

## Sheet: PAXB_RP6
id	Clutch	SL	Genotype	EB
1721-1	1721	21.695	MM	0.557591
1721-2	1721	20.515	MR	0.580169
1721-3	1721	19.81	MM	0.558919
1721-4	1721	18.295	MM	0.497604
1721-5	1721	20.205	MM	0.51487
1721-6	1721	17.7	MR	0.504909
1721-7	1721	19.885	MR	0.522174
1721-8	1721	21.42	MR	0.599648
1721-9	1721	18.72	MR	0.535234
1721-10	1721	18.795	MR	0.468828
1721-11	1721	20.27	MR	0.570872
1721-12	1721	21.265	MM	0.562018
1721-13	1721	19.9	MM	0.532135
1721-14	1721	20.68	MM	0.562018
1721-15	1721	20.065	MR	0.588581
1721-16	1721	17.16	MR	0.456654
1721-17	1721	18.8	MM	0.496497
1721-18	1721	22.125	MM	0.620234
1721-19	1721	20.81	MR	0.541432
1721-20	1721	18.77	MM	0.524831
1721-21	1721	22.165	MM	0.59832
1721-22	1721	21.74	MM	0.660521
1721-23	1721	22.015	MR	0.600977
1721-24	1721	19.965	MM	0.545195
1721-25	1721	22.48	MM	0.587695
1721-26	1721	18.55	MR	0.510664
1721-27	1721	20.13	MR	0.569987
1721-28	1721	18.345	MR	0.506901
1721-29	1721	20.265	MM	0.568437
1721-30	1721	21.12	MM	0.555599
1721-31	1721	21.69	MR	0.612708
1721-32	1721	20.26	MM	0.493398
1721-33	1721	18.24	MR	0.486094
1721-34	1721	22.615	MM	0.64569
1721-35	1721	19.63	MR	0.529922
1721-36	1721	21.455	MM	0.552057
1721-37	1721	19.87	MR	0.556263
1721-38	1721	19.945	MR	0.567995
1721-39	1721	20.68	MM	0.599648
1721-40	1721	21.98	MR	0.626432
1721-41	1721	17.72	MM	0.534128
1721-42	1721	22.71	MM	0.635065
1721-43	1721	20.52	MR	0.485208
1721-44	1721	21.22	MM	0.583932
1721-45	1721	19.87	MR	0.547852
1721-46	1721	21.755	NA	0.583047
1721-47	1721	20.57	MR	0.547852
1721-48	1721	20.335	MR	0.561133
1721-49	1721	21.35	MM	0.573971
1721-50	1721	19.85	MM	0.536784
1721-51	1721	19.24	MR	0.529701
1721-52	1721	20.2	MM	0.527044
1721-53	1721	19.68	MR	0.550286
1721-54	1721	19.01	NA	0.50181
1721-55	1721	21.72	MR	0.546523
1721-56	1721	20.49	MR	0.529922
1721-57	1721	22.42	MM	0.57375
1721-58	1721	21.185	MR	0.524609
1721-59	1721	21.07	MM	0.5525
1721-60	1721	20.68	MR	0.54763
1721-61	1721	21.7	MM	0.553828
1721-62	1721	21.525	MM	0.578841
1721-63	1721	21.03	MM	0.544753
1721-64	1721	20.175	MM	0.555599
1721-65	1721	22.04	MR	0.599206
1721-66	1721	21.29	NA	0.533906
1721-67	1721	20.915	MM	0.525273
1721-68	1721	22.07	MM	0.580391
1721-69	1721	21.115	NA	0.533685
1721-70	1721	19.825	MR	0.519961
1721-71	1721	19.995	NA	0.508008
1721-72	1721	21.82	NA	0.57375
1721-73	1721	19.455	MR	0.485872
1721-74	1721	21.79	MR	0.522839
1721-75	1721	20.98	NA	0.55737
1721-76	1721	16.085	MR	0.43651
1721-77	1721	18.915	NA	0.527487
1721-78	1721	20.39	MR	0.546081
1721-79	1721	19.925	NA	0.525052
1721-80	1721	20.71	NA	0.532135
1721-81	1721	21.795	NA	0.559141
1721-82	1721	19.09	MM	0.471927
1721-83	1721	20.87	NA	0.570208
1721-84	1721	18.39	NA	0.486758
1721-85	1721	18.525	MM	0.528815
1721-86	1721	20.25	NA	0.53457
1721-87	1721	22.99	MM	0.60806
1721-88	1721	23.86	NA	0.598763
1721-89	1721	22.005	MR	0.564896
1721-90	1721	22.725	MM	0.604518
1721-91	1721	20.925	NA	0.520182
1721-92	1721	22.24	MR	0.551172
1721-93	1721	18.775	MR	0.495169
1721-94	1721	18.8	MM	0.45931
1721-95	1721	20.775	NA	0.520182
1721-96	1721	19.095	NA	0.506458

## Sheet: FTC_RF1
id	Clutch	SL	Genotype	EB
1692-1	1692	11.245	FR	0.291262
1692-2	1692	12.985	FR	0.355111
1692-3	1692	12.035	FF	0.321244
1692-4	1692	12.13	MF	0.292595
1692-5	1692	10.865	FR	0.276605
1692-6	1692	11.605	MF	0.277382
1692-7	1692	11.66	FF	0.289708
1692-8	1692	12.345	FF	0.29959
1692-9	1692	12.145	MF	0.314026
1692-10	1692	11.875	NA	0.28993
1692-11	1692	12.125	FF	0.32724
1692-12	1692	11.075	FR	0.268943
1692-13	1692	11.385	FF	0.285932
1692-14	1692	10.66	MR	0.254285
1692-15	1692	11.56	MF	0.29426
1692-16	1692	11.165	MR	0.27394
1692-17	1692	11.58	FR	0.29315
1692-18	1692	12.26	FF	0.327795
1692-19	1692	12.05	MR	0.287265
1692-20	1692	11.11	MR	0.263391
1692-21	1692	11.9	FF	0.329461
1692-22	1692	11.765	MR	0.303144
1692-23	1692	11.91	MF	0.281158
1692-24	1692	12.05	MF	0.300812
1692-25	1692	11.16	MF	0.282712
1692-26	1692	12.49	FR	0.331681
1692-27	1692	11.91	MF	0.285266
1692-28	1692	11.885	MR	0.293261
1692-29	1692	10.8	FF	0.270053
1692-30	1692	11.48	FR	0.283822
1692-31	1692	11.03	FF	0.279159
1692-32	1692	12.04	MR	0.285155
1692-33	1692	12.21	MF	0.300479
1692-34	1692	11.195	FR	0.268832
1692-35	1692	12.33	MR	0.301922
1692-36	1692	10.705	FF	0.274717
1692-37	1692	11.155	MF	0.269387
1692-38	1692	11.6	FR	0.311694
1692-39	1692	12.18	FF	0.326129
1692-40	1692	12.34	MF	0.297925
1692-41	1692	11.795	FF	0.309695
1692-42	1692	11.515	FR	0.289152
1692-43	1692	10.7	MR	0.250732
1692-44	1692	11.76	MR	0.277937
1692-45	1692	11.57	MR	0.269276
1692-46	1692	11.895	MR	0.305476
1692-47	1692	11.215	MR	0.270498
1692-48	1692	11.995	MF	0.288042
1692-49	1692	11.96	MF	0.288264
1692-50	1692	11.25	FR	0.297259
1692-51	1692	11.565	FR	0.278715
1692-52	1692	11.355	FR	0.286487
1692-53	1692	12.215	MF	0.304143
1692-54	1692	11.59	FF	0.303477
1692-55	1692	11.555	FF	0.291595
1694-56	1694	11.11	MF	0.279714
1694-57	1694	11.55	MF	0.25473
1694-58	1694	11.92	FR	0.283045
1694-59	1694	10.965	FR	0.270164
1694-60	1694	12.195	FR	0.301145
1694-61	1694	11.73	MF	0.260504
1694-62	1694	10.765	MF	0.256395
1694-63	1694	9.14	MF	0.190103
1694-64	1694	10.75	MR	0.255507
1694-65	1694	11.43	FF	0.287931
1694-66	1694	11.975	MF	0.278604
1694-67	1694	12.1	MF	0.290596
1694-68	1694	11.335	MF	0.26328
1694-69	1694	11.73	MF	0.277715
1694-70	1694	11.76	FR	0.268277
1694-71	1694	10.4	MR	0.236297
1694-72	1694	11.155	FF	0.279159
1694-73	1694	11.1	MR	0.272496
1694-74	1694	11.775	MF	0.292928
1694-75	1694	10.695	FR	0.269165
1694-76	1694	11.6	NA	0.273274
1694-77	1694	11.66	FR	0.284933
1694-78	1694	12.075	MR	0.275161
1694-79	1694	11.475	FF	0.272607
1694-80	1694	11.57	FF	0.284267
1694-81	1694	11.77	FF	0.277271
1694-82	1694	11.59	NA	0.284822
1694-83	1694	11.99	MF	0.276161
1694-84	1694	11.55	MF	0.292484
1694-85	1694	11.275	NA	0.262947
1694-86	1694	10.72	NA	0.270831
1694-87	1694	10.955	MF	0.271719
1694-88	1694	11.335	NA	0.270386
1694-89	1694	11.07	MF	0.244736
1694-90	1694	11.525	MR	0.260171
1694-91	1694	11.575	MR	0.259282
1694-92	1694	11.665	MF	0.280602
1694-93	1694	11.775	FR	0.286376
1694-94	1694	11.405	MR	0.283267
1694-95	1694	10.835	FR	0.263835
1694-96	1694	11.53	NA	0.283267

## Sheet: FTC_RF2
id	Clutch	SL	Genotype	EB	Tooth #
1717-1	1717	10.65	MM	0.223497	NA
1717-2	1717	10.55	MR	0.215594	NA
1717-3	1717	9.26	MM	0.196877	NA
1717-4	1717	10.73	MR	0.241105	NA
1717-5	1717	11.015	MR	0.258713	NA
1717-6	1717	10.415	MM	0.221556	NA
1717-7	1717	10.6	MM	0.238887	NA
1717-8	1717	10.455	MR	0.233757	NA
1717-9	1717	11.61	MR	0.267586	NA
1717-10	1717	11.33	MM	0.249008	NA
1717-11	1717	11.465	MR	0.257743	NA
1717-12	1717	11.895	MM	0.259268	NA
1717-13	1717	11.39	MR	0.26925	NA
1717-14	1717	11.4	MR	0.2662	NA
1717-15	1717	8.76	MR	0.161384	NA
1717-16	1717	10.29	MM	0.215594	NA
1717-17	1717	10.81	MM	0.241937	NA
1717-18	1717	9.77	MM	0.197016	NA
1717-19	1717	10.2	MR	0.212821	NA
1717-20	1717	10.96	MM	0.261763	NA
1717-21	1717	10.95	MR	0.249978	NA
1717-22	1717	11.505	MR	0.27438	NA
1717-23	1717	11.25	MR	0.268557	NA
1717-24	1717	11.115	MR	0.249562	NA
1717-25	1717	11.255	MR	0.273548	NA
1717-26	1717	10.62	MR	0.228211	NA
1717-27	1717	10.605	MR	0.24679	NA
1717-28	1717	10.76	MM	0.245958	NA
1717-29	1717	11.065	MM	0.244571	NA
1717-30	1717	12.135	MR	0.26315	NA
1717-31	1717	11.335	MR	0.247067	NA
1717-32	1717	8.7	MR	0.18426	NA
1732-33	1732	10.695	MR	0.253999	NA
1732-34	1732	10.5	MR	0.249147	NA
1732-35	1732	11.03	MR	0.270359	NA
1732-36	1732	9.3	MM	0.205057	NA
1732-37	1732	10.89	MR	0.259961	NA
1732-38	1732	10.805	MR	0.265784	NA
1732-39	1732	10.765	MM	0.259545	NA
1732-40	1732	11.83	MM	0.288661	NA
1732-41	1732	10.49	MM	0.247621	NA
1732-42	1732	10.35	MM	0.274796	NA
1732-43	1732	10.675	MR	0.263011	NA
1732-44	1732	11.46	MR	0.274519	NA
1732-45	1732	10.245	MM	0.240551	NA
1732-46	1732	10.46	MR	0.235975	NA
1732-47	1732	11.125	MM	0.257881	NA
1732-48	1732	10.78	MR	0.266339	NA
1732-49	1732	11.25	MR	0.262457	NA
1732-50	1732	10.605	MR	0.253999	NA
1732-51	1732	10.87	MM	0.250672	NA
1732-52	1732	9.865	MM	0.215594	NA
1732-53	1732	10.84	MM	0.270359	NA
1732-54	1732	11.115	MR	0.270221	NA
1732-55	1732	10.775	MM	0.235143	NA
1732-56	1732	11.555	MM	0.26828	NA
1732-57	1732	11.26	MR	0.25899	NA
1732-58	1732	10.2	MR	0.238887	NA
1732-59	1732	9.57	MM	0.207414	NA
1732-60	1732	10.805	MR	0.267864	NA
1732-61	1732	10.395	NA	0.262595	NA
1732-62	1732	10.07	MR	0.236946	NA
1732-63	1732	11.735	MR	0.28464	NA
1732-64	1732	10.875	MR	0.262595	NA
1732-65	1732	11.35	MM	0.293929	NA
1732-66	1732	10.125	MM	0.242907	NA
1732-67	1732	10.965	MR	0.237778	NA
1732-68	1732	9.96	MM	0.245819	NA
1732-69	1732	11.135	MM	0.270498	NA
1732-70	1732	10.47	MM	0.236946	NA
1732-71	1732	10.475	MR	0.263288	NA
1732-72	1732	10.57	MM	0.24166	NA
1732-73	1732	10.675	NA	0.259545	NA
1732-74	1732	11.285	MM	0.253583	NA
1732-75	1732	11.235	MM	0.2662	NA
1732-76	1732	11.25	MR	0.259545	NA
1737-1	1737	28.74	FR	NA	52
1737-2	1737	31.74	FR	NA	67
1737-3	1737	29.8	MF	NA	59
1737-4	1737	29.465	MF	NA	53
1737-5	1737	33.345	MM	NA	59
1737-6	1737	30.575	MM	NA	50
1737-7	1737	30.89	MF	NA	56
1737-8	1737	28.445	MM	NA	55
1737-9	1737	29.405	FR	NA	53
1737-10	1737	29.94	MF	NA	69
1737-11	1737	28.5	FR	NA	64
1737-12	1737	29.4	FR	NA	63
1737-13	1737	28.175	MF	NA	60
1737-14	1737	31.87	FR	NA	70
1737-15	1737	30.5	MM	NA	55
1737-16	1737	33	MR	NA	NA
1737-17	1737	30.82	FR	NA	60
1737-18	1737	29.755	FR	NA	60
1737-19	1737	32.76	MR	NA	59
1737-20	1737	30.52	MM	NA	56
1737-21	1737	30.645	MR	NA	67
1737-22	1737	32.23	MR	NA	63
1737-23	1737	31.69	MM	NA	59
1737-24	1737	31.425	FR	NA	64
1737-25	1737	31.705	FR	NA	71
1737-26	1737	33.18	MM	NA	66
1737-27	1737	31.485	MF	NA	60
1737-28	1737	28.875	FR	NA	52
1737-29	1737	28.69	MF	NA	54
1737-30	1737	30.675	MF	NA	53
1737-31	1737	30.07	MR	NA	68
1737-32	1737	32.85	FR	NA	70
1737-33	1737	32.205	NA	NA	67
1737-34	1737	29.175	MF	NA	50
1737-35	1737	30.33	MR	NA	57
1737-36	1737	30.625	MF	NA	61
1737-37	1737	28.88	NA	NA	66
1737-38	1737	30.705	MR	NA	50
1737-39	1737	30.44	MM	NA	55
1737-40	1737	31.085	FR	NA	65
1737-41	1737	31.09	MM	NA	51
1737-42	1737	31.545	MM	NA	53
1737-43	1737	29.44	FR	NA	69
1737-44	1737	29.075	FR	NA	57
1737-45	1737	27.635	MM	NA	49
1737-46	1737	27.84	MF	NA	53
1737-47	1737	31.81	FR	NA	61
1737-48	1737	30.965	FR	NA	68

## Sheet: FTC_RF3
id	Clutch	SL	Genotype	EB
1691-1	1691	12.375	MR	0.308626
1691-2	1691	11.56	MF	0.296979
1691-3	1691	10.48	MR	0.244155
1691-4	1691	12.28	MF	0.313201
1691-5	1691	10.98	MM	0.269389
1691-6	1691	11.42	MM	0.274519
1691-7	1691	10.655	MR	0.299336
1691-8	1691	10.865	FR	0.282144
1691-9	1691	10.53	MF	0.275351
1691-10	1691	11.665	MF	0.301832
1691-11	1691	10.995	FR	0.277846
1691-12	1691	12.265	MM	0.309042
1691-13	1691	12.165	MM	0.286581
1691-14	1691	11.66	MM	0.292959
1691-15	1691	10.655	MM	0.257604
1691-16	1691	9.89	FR	0.270498
1691-17	1691	11.2	MR	0.285194
1691-18	1691	9.94	MM	0.247621
1691-19	1691	11.51	FR	0.300168
1691-20	1691	12.445	MR	0.329977
1691-21	1691	11.915	FR	0.302664
1691-22	1691	10.15	MF	0.262041
1691-23	1691	12.815	MR	0.321936
1691-24	1691	11.105	MF	0.269389
1691-25	1691	11.755	MM	0.290324
1691-26	1691	11.465	FR	0.313756
1691-27	1691	12.14	MR	0.316806
1691-28	1691	11.45	MM	0.293929
1691-29	1691	11.555	MF	0.308764
1691-30	1691	10.345	MF	0.270498
1691-31	1691	11.71	MR	0.302664
1691-32	1691	10.82	FR	0.303357
1691-33	1691	11.455	NA	0.307101
1691-34	1691	11.525	MF	0.263427
1691-35	1691	12.275	FR	0.327343
1691-36	1691	12.53	MM	0.304466
1691-37	1691	10.01	MM	0.244155
1691-38	1691	11.65	FR	0.299891
1691-39	1691	12.045	MM	0.293652
1691-40	1691	12.01	FR	0.317915
1691-41	1691	9.945	MM	0.228211
1691-42	1691	12.21	MF	0.308348
1691-43	1691	11.08	FR	0.285194
1691-44	1691	11.94	MF	0.294484
1691-45	1691	11.45	MM	0.277014
1691-46	1691	10.735	FR	0.287136
1691-47	1691	11.055	MF	0.294345
1691-48	1691	11.795	MR	0.315142
1691-49	1691	11.8	MM	0.284085
1691-50	1691	11.6	MM	0.317222
1691-51	1691	11.665	MM	0.291434
1691-52	1691	11.67	MF	0.310705
1691-53	1691	12.35	MR	0.302664
1691-54	1691	12.035	MM	0.292404
1691-55	1691	12.225	FR	0.358954
1691-56	1691	12.45	MF	0.325402
1691-57	1691	11.34	MF	0.294068
1691-58	1691	11.99	MR	0.318192
1691-59	1691	11.73	MR	0.312785
1691-60	1691	12.725	MF	0.343148
1691-61	1691	12.01	MR	0.311953
1691-62	1691	11.57	MF	0.318608

## Sheet: FTC_fractionation
id	Clutch	SL	Genotype	EB (mm)
1763-1	1763	9.245	mf	0.2313
1763-2	1763	10.065	mr	0.224859
1763-3	1763	9.555	mf	0.242182
1763-4	1763	9.63	mr	0.214755
1763-5	1763	10.925	mr	0.251954
1763-6	1763	9.54	mf	0.23774
1763-7	1763	10.42	mr	0.250399
1763-8	1763	11.085	mr	0.263613
1763-9	1763	9.755	mr	0.221528
1763-10	1763	9.11	NA	0.2132
1763-11	1763	9.99	mf	0.249622
1763-12	1763	10.11	mf	0.274384
1763-13	1763	9.8	mr	0.216087
1763-14	1763	10.115	mr	0.235075
1763-15	1763	9.295	mf	0.208647
1763-16	1763	9.825	mf	0.236519
1763-17	1763	10.21	mr	0.238517
1763-18	1763	10.415	mf	0.253841
1763-19	1763	8.935	mr	0.211534
1763-20	1763	10.045	mf	0.229301
1763-21	1763	9.475	mr	0.215643
1763-22	1763	9.395	mr	0.224748
1763-23	1763	10.145	mr	0.264279
1763-24	1763	9.64	mf	0.225748
1763-25	1763	10	NA	0.242293
1763-26	1763	10.565	mf	0.257617
1763-27	1763	9.94	mr	0.224304
1763-28	1763	10.185	mr	0.21531
1763-29	1763	9.96	mf	0.238517
1763-30	1763	10.105	mf	0.24629
1763-31	1763	10.05	mr	0.246624
1763-32	1763	10.8	mr	0.259949
1763-33	1763	9.36	mf	0.211645
1763-34	1763	9.675	mr	0.226414
1763-35	1763	10.13	mr	0.243736
1763-36	1763	10.855	mr	0.239961
1763-37	1763	9.82	mr	0.218197
1763-38	1763	10.285	mr	0.260171
1763-39	1763	9.49	mr	0.205871
1763-40	1763	9	mr	0.210091
1763-41	1763	10.055	mf	0.231633
1763-42	1763	9.05	mf	0.220973
1763-43	1763	8.595	mf	0.187994
1763-44	1763	9.68	mr	0.21209
1763-45	1763	9.85	mr	0.222083
1763-46	1763	9.945	NA	0.234964
1763-47	1763	10.345	mf	0.253619
1763-48	1763	10.3	mr	0.216087
1763-49	1763	11.38	NA	0.28038
1763-50	1763	10.185	mr	0.243959
1763-51	1763	9.55	mr	0.230411
1763-52	1763	8.22	mf	0.174002
1763-53	1763	9.055	mr	0.22064
1763-54	1763	8.835	mf	0.203206
1763-55	1763	10.01	mf	0.234742
1763-56	1763	10.195	mf	0.265279
1763-57	1763	9.535	mr	0.208203
1763-58	1763	9.295	mf	0.217309
1763-59	1763	7.99	mf	0.156791
1763-60	1763	9.965	mr	0.231633
1764-1	1764	9.22	mm	0.190992
1764-2	1764	9.365	NA	0.215532
1764-3	1764	9.16	NA	0.21209
1764-4	1764	9.315	mr	0.211867
1764-5	1764	9.125	mm	0.198543
1764-6	1764	9.29	mm	0.20465
1764-7	1764	8.355	mm	0.187105
1764-8	1764	9.115	mr	0.220418
1764-9	1764	8.87	NA	0.195211
1764-10	1764	9.55	NA	0.211312
1764-11	1764	8.725	mr	0.192768
1764-12	1764	8.705	NA	0.197543
1764-13	1764	8.4	mm	0.187105
1764-14	1764	8.65	mm	0.196655
1764-15	1764	8.065	mr	0.184218
1764-16	1764	10.215	mm	0.22919
1764-17	1764	8.99	mr	0.207537
1764-18	1764	8.12	mm	0.161455
1764-19	1764	8.515	NA	0.185551
1764-20	1764	8.13	mm	0.145909
1764-21	1764	7.825	NA	0.169005
1764-22	1764	9.075	NA	0.180554
1764-23	1764	7.965	NA	0.17056
1764-24	1764	9.245	mm	0.20898
1764-25	1764	9.425	mr	0.205205
1764-26	1764	9.095	mr	0.198543
1764-27	1764	8.735	mr	0.192546
1764-28	1764	9.69	mm	0.224859
1764-29	1764	8.305	mm	0.177222
1764-30	1764	8.75	mr	0.21209
1764-31	1764	8.75	mr	0.206871
1764-32	1764	9.665	mm	0.225637
1764-33	1764	8.98	mr	0.206982
1764-34	1764	9.425	mm	0.197987
1764-35	1764	9.145	mr	0.208203
1764-36	1764	8.49	mr	0.185106
1764-37	1764	8.62	mm	0.188549
1764-38	1764	8.93	mr	0.203206
1764-39	1764	8.44	mr	0.170005
1764-40	1764	8.385	mm	0.155347
1764-41	1764	8.875	mr	0.191325
1764-42	1764	8.59	mr	0.18122
1764-43	1764	9.145	mm	0.208647
1764-44	1764	8.32	mm	0.169339
1764-45	1764	8.955	mr	0.205427
1764-46	1764	9.205	mm	0.212201
1764-47	1764	8.55	mm	0.190325
1764-48	1764	8.765	mm	0.191214
1764-49	1764	7.975	mm	0.162454
1764-50	1764	7.97	NA	0.150017
1764-51	1764	7.98	mr	0.16634

[truncated: 6 more sheets: FTC-AP2 TALEN, LITC-AP2 TALEN, Glazer et al. bone length, AP2 ASE, 13 dpf cartilage, 20 dpf bone]
